# Supplementary material
Source: PubMed Central journal article supplement (PMC6554684)
Supplement: mmc1.pdf [file mmc1.pdf]

**YMTHE, Volume 27**

**Supplemental Information**

**Therapeutic Delivery of miR-29b Enhances  
Radiosensitivity in Cervical Cancer**

**Tingting Zhang, Xiang Xue, and Huixia Peng**

## Supplemental figures

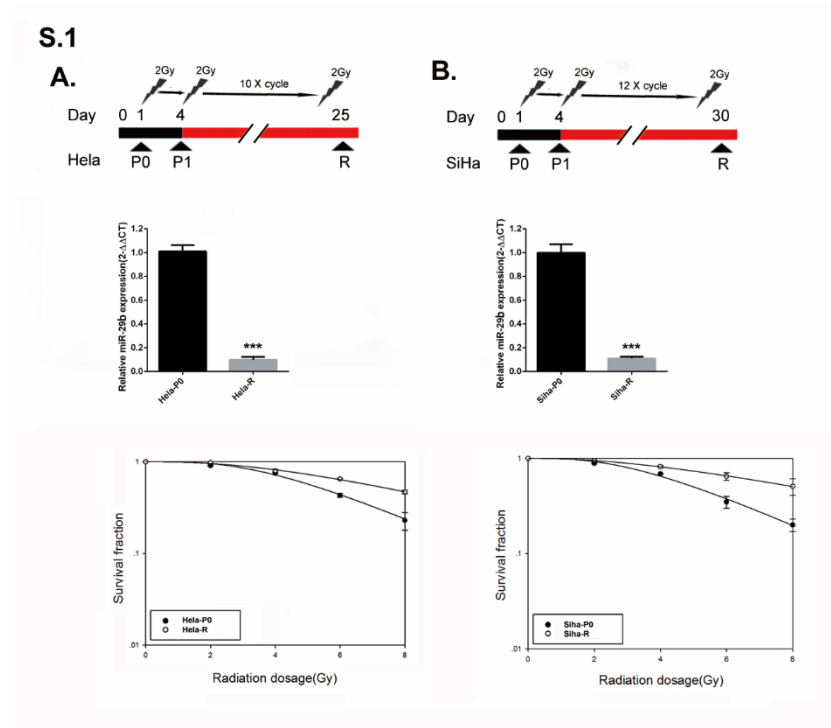

S1 Two radioresistant cervical cancer cell variants were established. Top: schematic representation of the generation of a radioresistant subline (Hela-R or Siha-R) from the parental cells (Hela-P0 or Siha-P0). Middle: miR-29b expression profiling of Hela-R or Siha-R cells relative to Hela-P0 or Siha-P0 cells using a qPCR-based miRNA array. Bottom: miR-29b expression increased radiosensitivity of Hela-R or Siha-R cells. The survival fractions were determined by colony-forming assay as described in “Materials and methods”. Data was expressed as mean  $\pm$  SD of triplicates in one experiment. Shown was representative of 3 independent experiments

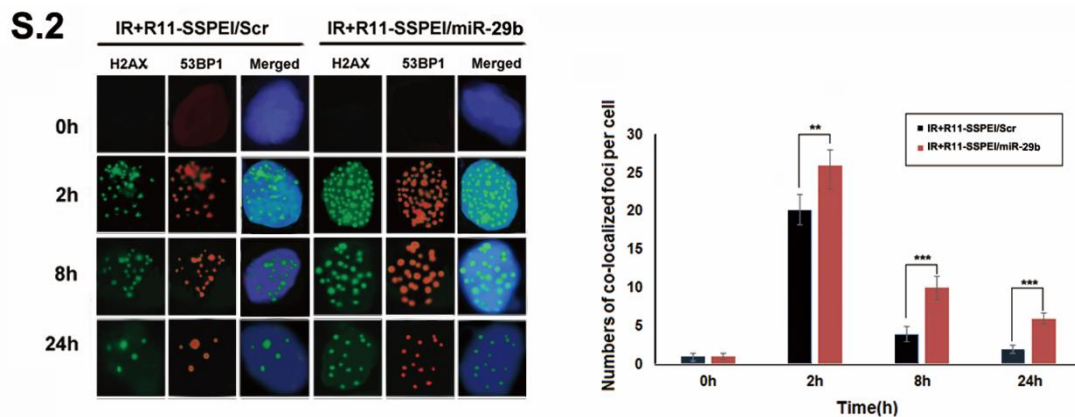

S2 Internalization of nanoparticles in Siha-R cells. The number of co-localized foci (phospho- $\gamma$ -H2AX and 53BP1) was determined for

each time point in R11-SSPEI/Scr or R11-SSPEI/miR-29b treated cells. The remaining merged foci in the nuclei were counted in 3 independent experiments (50 nuclei each). Statistical significance was evaluated using Student's t-test (\*,  $P < 0.05$ ; \*\*,  $P < 0.01$ ).

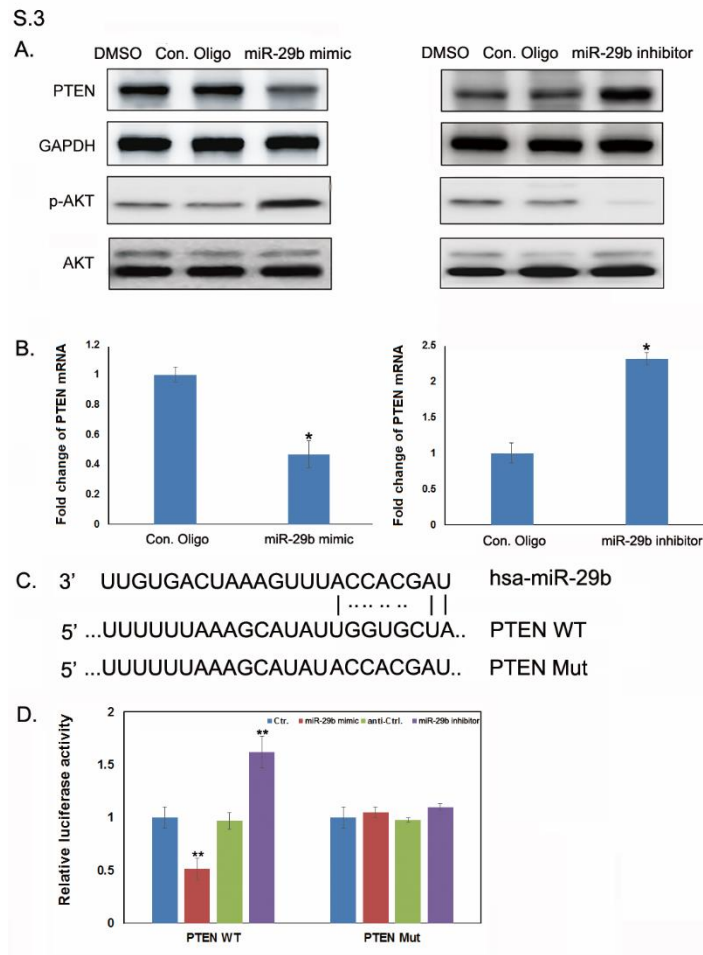

S3 PTEN are targets of miR-29b.

A. PTEN contain predicted miR-29b binding sites. In the figure the alignment of the seed regions of miR-29b with PTEN is shown.

B. The expression levels of PTEN, p-AKT and AKT after the inhibition of miR-29b via lentiviral transduction or the overexpression of the same miRNA by oligonucleotide transfection in HeLa-R cells were detected using western blot.

C. The mRNA expression levels of PTEN after the inhibition of miR-29b or the overexpression of the same miRNA in HeLa-R cells was detected using qRT-PCR. \* $p < 0.05$ .

D. PTEN 3'UTRs are targets of miR-29b. pluc3-PTEN that contained a wildtype or mutated PTEN 3'UTRs (indicated as WT or mut on the X-axis) was transfected into HeLa-R cells. The relative repression of firefly luciferase was standardized to a transfection control. The reporter assays were performed three times with essentially identical results. \* $p < 0.05$ .

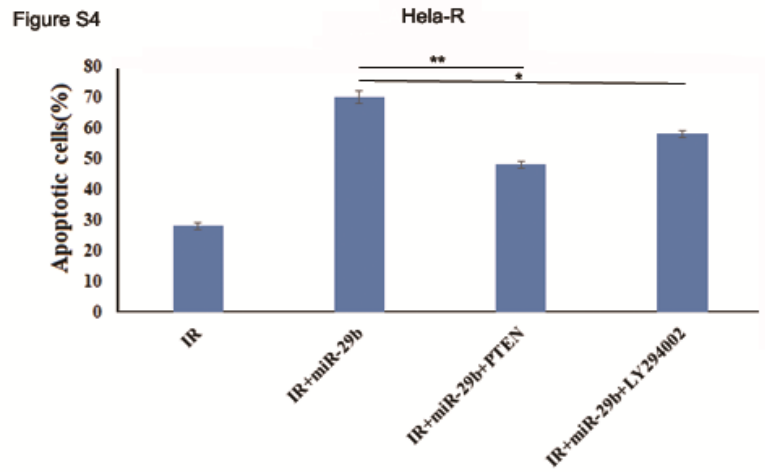

S4. Inhibition of PI3K/Akt signaling pathway can partially reverse miR-29b-mediated-PTEN radiosensitivity in HeLa-R cells.

Indicated cells were treated with or without 10  $\mu$ M Ly294002 in the presence of IR. The cells were stained with PI/Annexin V for measuring the percentage of apoptotic cells. The percentage of apoptotic cells in experiment was presented as bar graphs. ns, no significance; \* $p$ <0.05, \*\* $p$ <0.03.

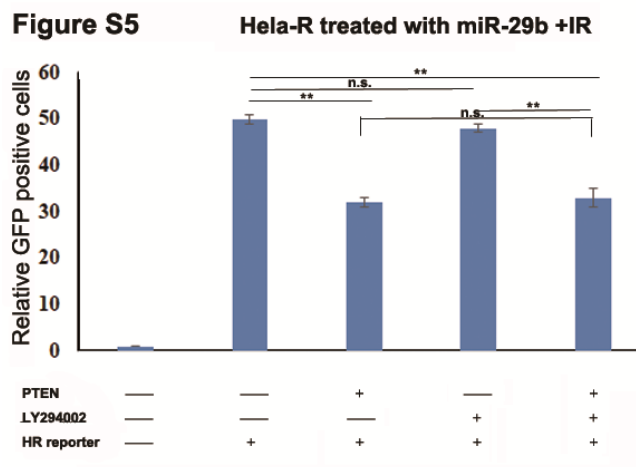

S5. The role of PTEN-PI3K-AKT pathway in HR repair assays of HeLa-R-GFP cells. HeLa-R-GFP cells transfected with miR-29b under radiation were re-expressed PTEN alone or in combination with LY294002.

Shown are the means  $\pm$  SEM from three experiments.  $n = 3$  wells per group.
